# Supplementary material for: Depression risk in users of different doses of levonorgestrel intrauterine systems: a nationwide prospective cohort study
Source: PubMed Central journal article supplement — Lancet Reg Health Eur. 2024 Jan 5;38:100813. doi: 10.1016/j.lanepe.2023.100813 (PMC10928294; doi:10.1016/j.lanepe.2023.100813), 2024-01-05
Supplement: mmc1.pdf [file mmc1.pdf]

## Supplementary materiel

### Table of Contents

|                                                                                                                                                                          |   |
|--------------------------------------------------------------------------------------------------------------------------------------------------------------------------|---|
| Figure S1: Study population flowchart .....                                                                                                                              | 2 |
| Table S1: Data sources and variable definitions.....                                                                                                                     | 3 |
| Table S2: Sensitivity analysis in the first year of prescription redemption. ....                                                                                        | 4 |
| Figure S2: Adjusted* incidence rate ratios of a first antidepressant use for first time users of the 13.5-mg low-dose LNG-IUS compared to 19.5-mg low-dose LNG-IUS. .... | 5 |

**Figure S1: Study population flowchart**

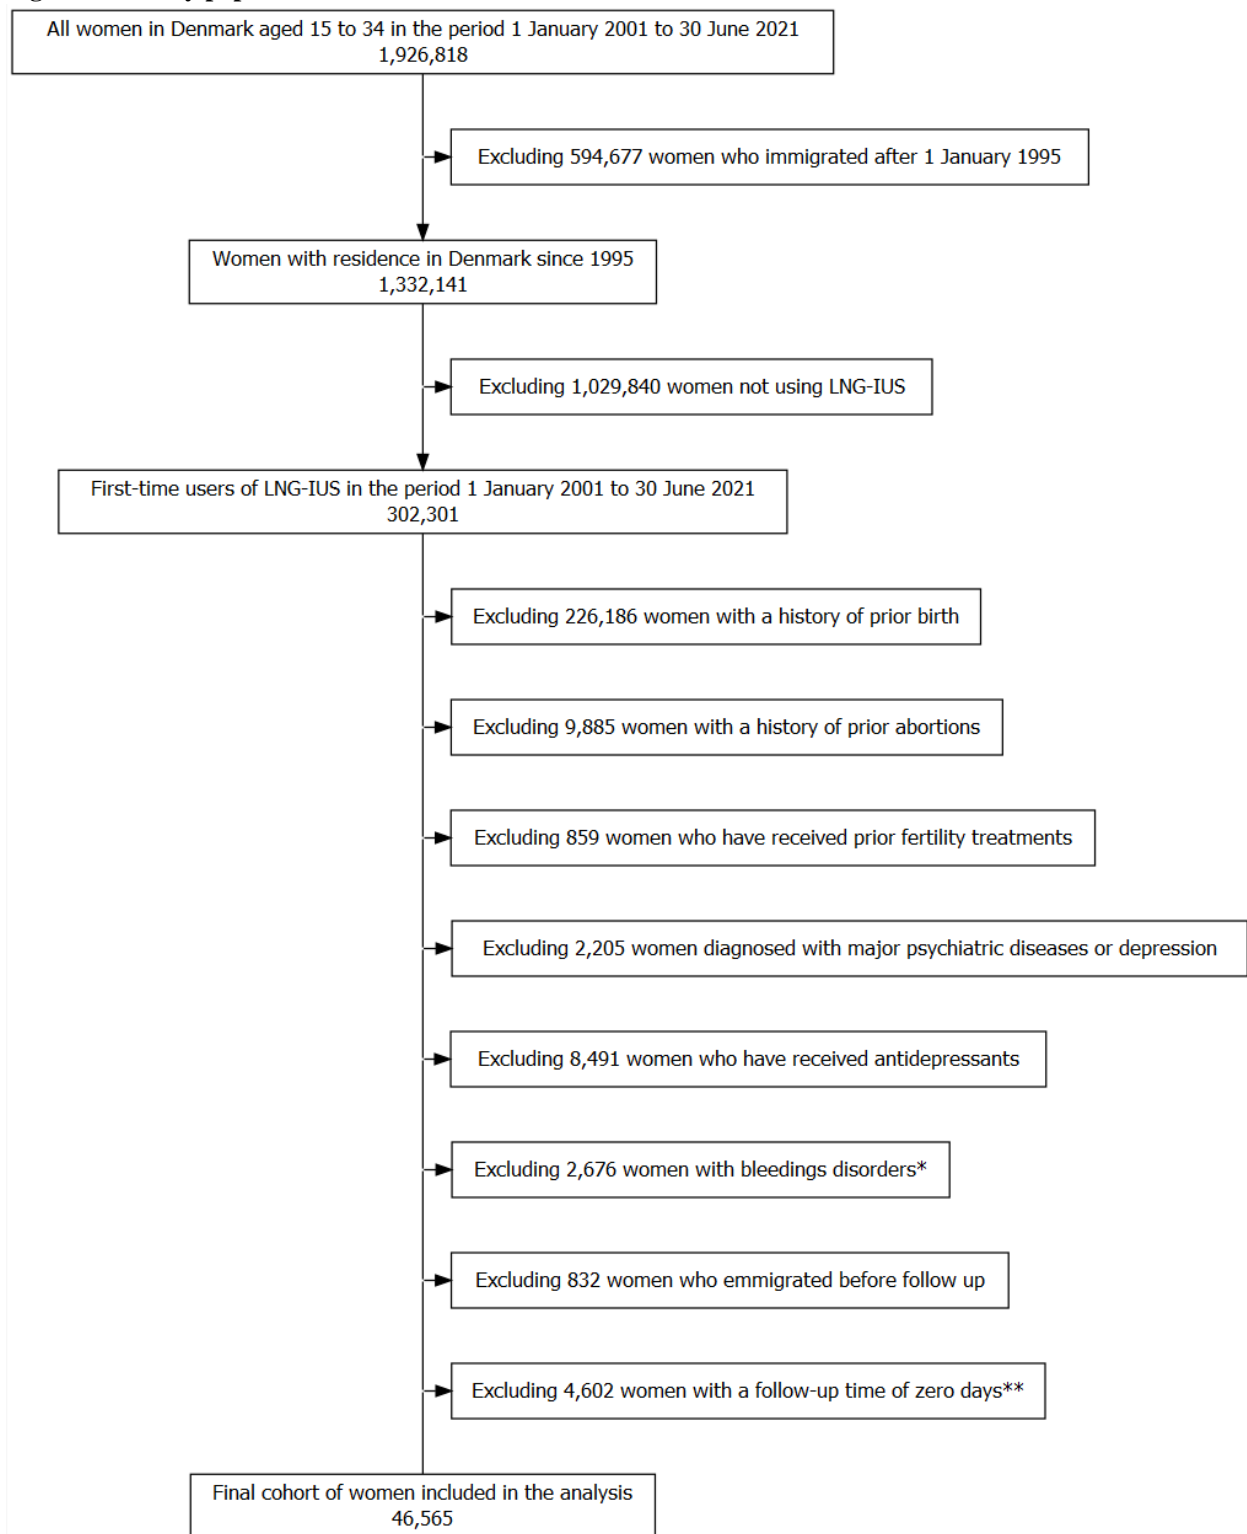

\* Having been diagnosed with endometriosis, heavy menstrual bleeding, polyp, myoma or dysmenorrhoea, or prescribed iron supplements.

\*\* Follow-up time of zero days due to: entry at exit date, redeeming other hormonal contraception at entry or redeeming other hormonal contraception before their 15<sup>th</sup> birthday.

**Table S1: Data sources and variable definitions**

| Variable                                  | Data source                                         | Period of availability | Classification                                        | Definition                                                                                                                                                   |
|-------------------------------------------|-----------------------------------------------------|------------------------|-------------------------------------------------------|--------------------------------------------------------------------------------------------------------------------------------------------------------------|
| <i>Outcome &amp; Exposure</i>             |                                                     |                        |                                                       |                                                                                                                                                              |
| Antidepressant                            | The Danish Prescription Registry                    | 1995-                  | ATC                                                   | N06A*<br>except N06AX12                                                                                                                                      |
| Hormonal contraception                    | The Danish Prescription Registry                    | 1995-                  | ATC                                                   | Hormonal contraceptives:<br>G03AA, G03AB, G03AC,<br>G03HB01, G02BB01<br>LNG-IUS (brand names were used<br>to distinguish between the 3<br>types):<br>G02BA03 |
| <b>Exclusion &amp; Censoring Criteria</b> |                                                     |                        |                                                       |                                                                                                                                                              |
| Depression diagnoses                      | The Danish National Patient Registry<br>Psychiatric | 1994                   | ICD-10                                                | F32-F339                                                                                                                                                     |
|                                           | Central Research Registry                           | 1995                   |                                                       |                                                                                                                                                              |
| Major psychiatric diagnoses               | The Danish National Patient Registry<br>Psychiatric | 1994                   | ICD-10                                                | F0*, F30*, F31*<br>F2*, F7*, F38-F39                                                                                                                         |
|                                           | Central Research Registry                           | 1995                   |                                                       |                                                                                                                                                              |
| Endometriosis                             | The Danish National Patient Registry                | 1977                   | ICD-10, ICD-8                                         | N80*, 6253*                                                                                                                                                  |
| Heavy menstrual bleeding                  | The Danish National Patient Registry                | 1995                   | ICD-10                                                | DN92*                                                                                                                                                        |
| Polyp, Myoma                              | The Danish National Patient Registry                | 1995                   | ICD-10                                                | N84.0 Polyp of corpus uteri<br>D25 Leiomyoma of uterus                                                                                                       |
| Dysmenorrhoea                             | The Danish National Patient Registry                | 1995                   | ICD-10                                                | N94.3-6                                                                                                                                                      |
| Abortion                                  | The Danish National Patient Registry                | 1995                   | ICD-10                                                | DO0*                                                                                                                                                         |
| Iron supplement                           | The Danish Prescription Registry                    | 1995                   | ATC                                                   | B03A*                                                                                                                                                        |
| Infertility treatment                     | The Danish Prescription Registry                    | 1995                   | ATC                                                   | G03G*                                                                                                                                                        |
| Parity                                    | The Danish Medical Birth Registry                   | 1973-2018              | Each observation in the Danish Medical Birth Registry |                                                                                                                                                              |
|                                           | The Danish National Patient Registry                | 2019-2021              | ICD10                                                 | O8*                                                                                                                                                          |
| Death or emigration                       | The Civil registration system                       | 1968-                  | Status as dead or emigrated                           |                                                                                                                                                              |

ATC: The Anatomical Therapeutic Chemical Classification System, ICD8: International Classification of Diseases, Revision 8, ICD10: International Classification of Diseases, Revision 10.

**Table S2: Sensitivity analysis in the first year of prescription redemption.**

| Analysis                                                                                          | Type of hormonal LNG-IUS | Women N | Person-Year | Events | Adjusted* Incidence Rate Ratio (95% CI) |
|---------------------------------------------------------------------------------------------------|--------------------------|---------|-------------|--------|-----------------------------------------|
| Age 15-19 years                                                                                   | 13.5-mg                  | 5,240   | 3,865       | 65     | 0.62 (0.43-0.89)                        |
|                                                                                                   | 19.5-mg                  | 6,444   | 4,017       | 78     | 0.60 (0.42-0.85)                        |
|                                                                                                   | 52-mg                    | 2,419   | 1,583       | 53     | Reference                               |
| Additionally adjusted for use of other hormonal contraception before initiation of LNG-IUS        | 13.5-mg                  | 15,994  | 14,273      | 208    | 0.68 (0.56-0.82)                        |
|                                                                                                   | 19.5-mg                  | 20,659  | 15,236      | 269    | 0.67 (0.56-0.81)                        |
|                                                                                                   | 52-mg                    | 9,897   | 8,359       | 203    | Reference                               |
| LNG-IUS users exclusively purchasing their high-dose LNG-IUS prior to launch of the low-dose type | 13.5-mg                  | 15,994  | 14,273      | 208    | 0.56 (0.44-0.72)                        |
|                                                                                                   | 19.5-mg                  | 20,659  | 15,236      | 269    | 0.57 (0.45-0.71)                        |
|                                                                                                   | 52-mg                    | 3,632   | 3,142       | 99     | Reference                               |
| Period 2017-2021                                                                                  | 13.5-mg                  | 8,713   | 7,354       | 103    | 0.75 (0.54-1.04)                        |
|                                                                                                   | 19.5-mg                  | 20,545  | 15,145      | 262    | 0.83 (0.62-1.11)                        |
|                                                                                                   | 52-mg                    | 3,774   | 2,944       | 56     | Reference                               |
| Period 2014-2021                                                                                  | 13.5-mg                  | 15,935  | 14,225      | 205    | 0.73 (0.58-0.93)                        |
|                                                                                                   | 19.5-mg                  | 20,618  | 15,204      | 267    | 0.73 (0.58-0.92)                        |
|                                                                                                   | 52-mg                    | 6,248   | 5,205       | 104    | Reference                               |
| Outcome defined as two prescriptions of antidepressive in a two-year period                       | 13.5-mg                  | 15,994  | 14,285      | 171    | 0.67 (0.54-0.83)                        |
|                                                                                                   | 19.5-mg                  | 20,660  | 15,256      | 212    | 0.67 (0.55-0.83)                        |
|                                                                                                   | 52-mg                    | 9,898   | 8,376       | 163    | Reference                               |
| Outcome defined as three prescriptions of antidepressive in a two-year period                     | 13.5-mg                  | 15,995  | 14,296      | 146    | 0.64 (0.51-0.80)                        |
|                                                                                                   | 19.5-mg                  | 20,661  | 15,268      | 181    | 0.68 (0.55-0.85)                        |
|                                                                                                   | 52-mg                    | 9,899   | 8,384       | 146    | Reference                               |
| Quasi Poisson<br>To compensate for overdispersion                                                 | 13.5-mg                  | 15,994  | 14,273      | 208    | 0.66 (0.45-0.95)                        |
|                                                                                                   | 19.5-mg                  | 20,659  | 15,236      | 269    | 0.66 (0.46-0.94)                        |
|                                                                                                   | 52-mg                    | 9,897   | 8,359       | 203    | Reference                               |

\* Adjusted for: age (1-year intervals), calendar time (1-year intervals), and educational status (elementary school, Secondary school, skilled worker, Theoretical education).

**Figure S2: Adjusted\* incidence rate ratios of a first antidepressant use for first time users of the 13.5-mg low-dose LNG-IUS compared to 19.5-mg low-dose LNG-IUS.**

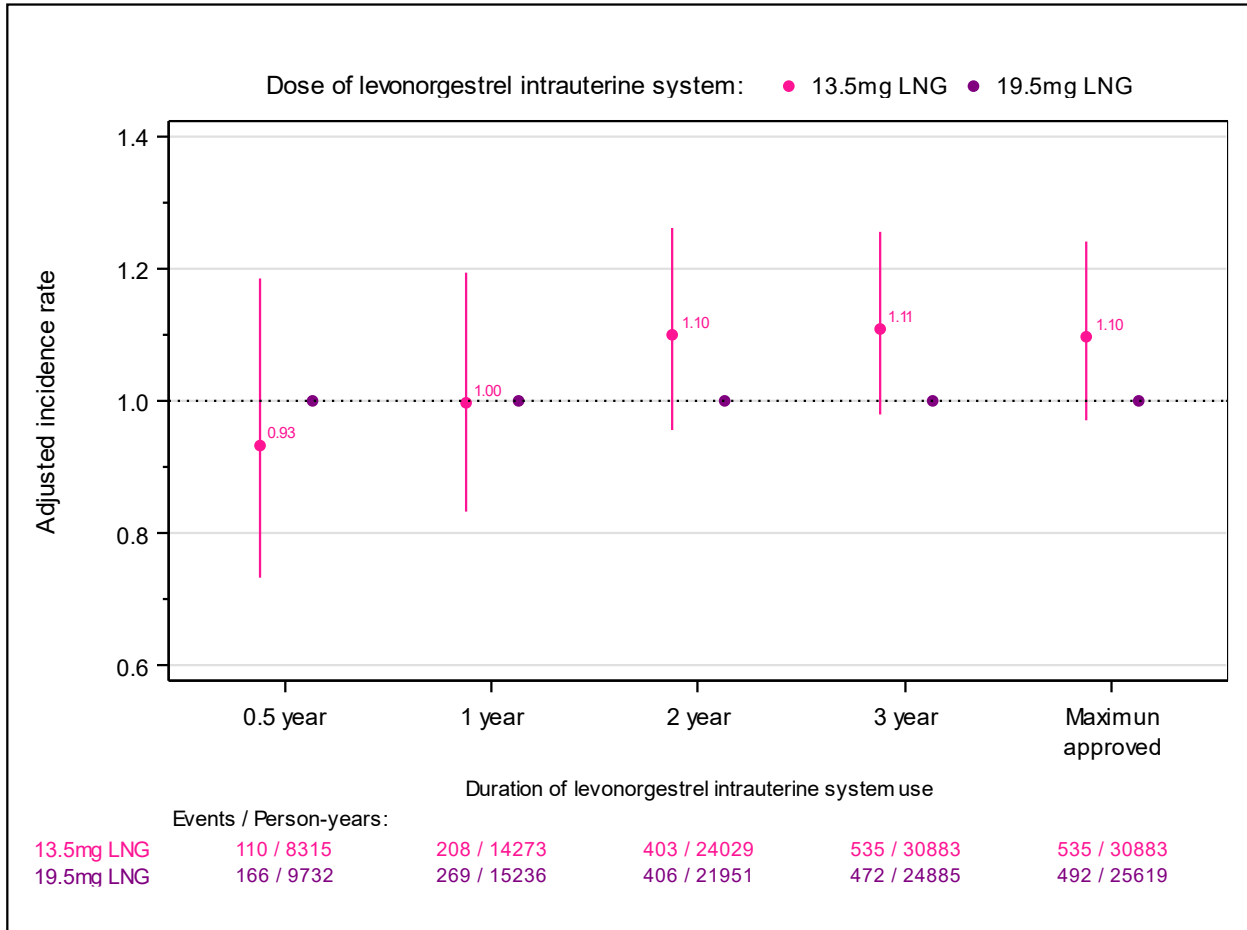

\*Adjusted for: age (1-year intervals), calendar time (1-year intervals), and educational status (elementary school, Secondary school, skilled worker, Theoretical education).
